# Supplementary material
Source: publisher site journal article supplement (https://www.spandidos-publications.com/950/downloadSupplementary)

Figure S1. Expression level and connection level correlations between all combinations of pairs within the four datasets. (A) Correlations ranked according to expression level. Each dot represents the rank of the average expression level of a gene out of the average expression level of all genes. (B) Correlations ranked according to connectivity in the co-expression network. Each dot represents the rank of the connectivity of a gene out of the connectivity of all genes. Cor, Pearson correlation coefficient.

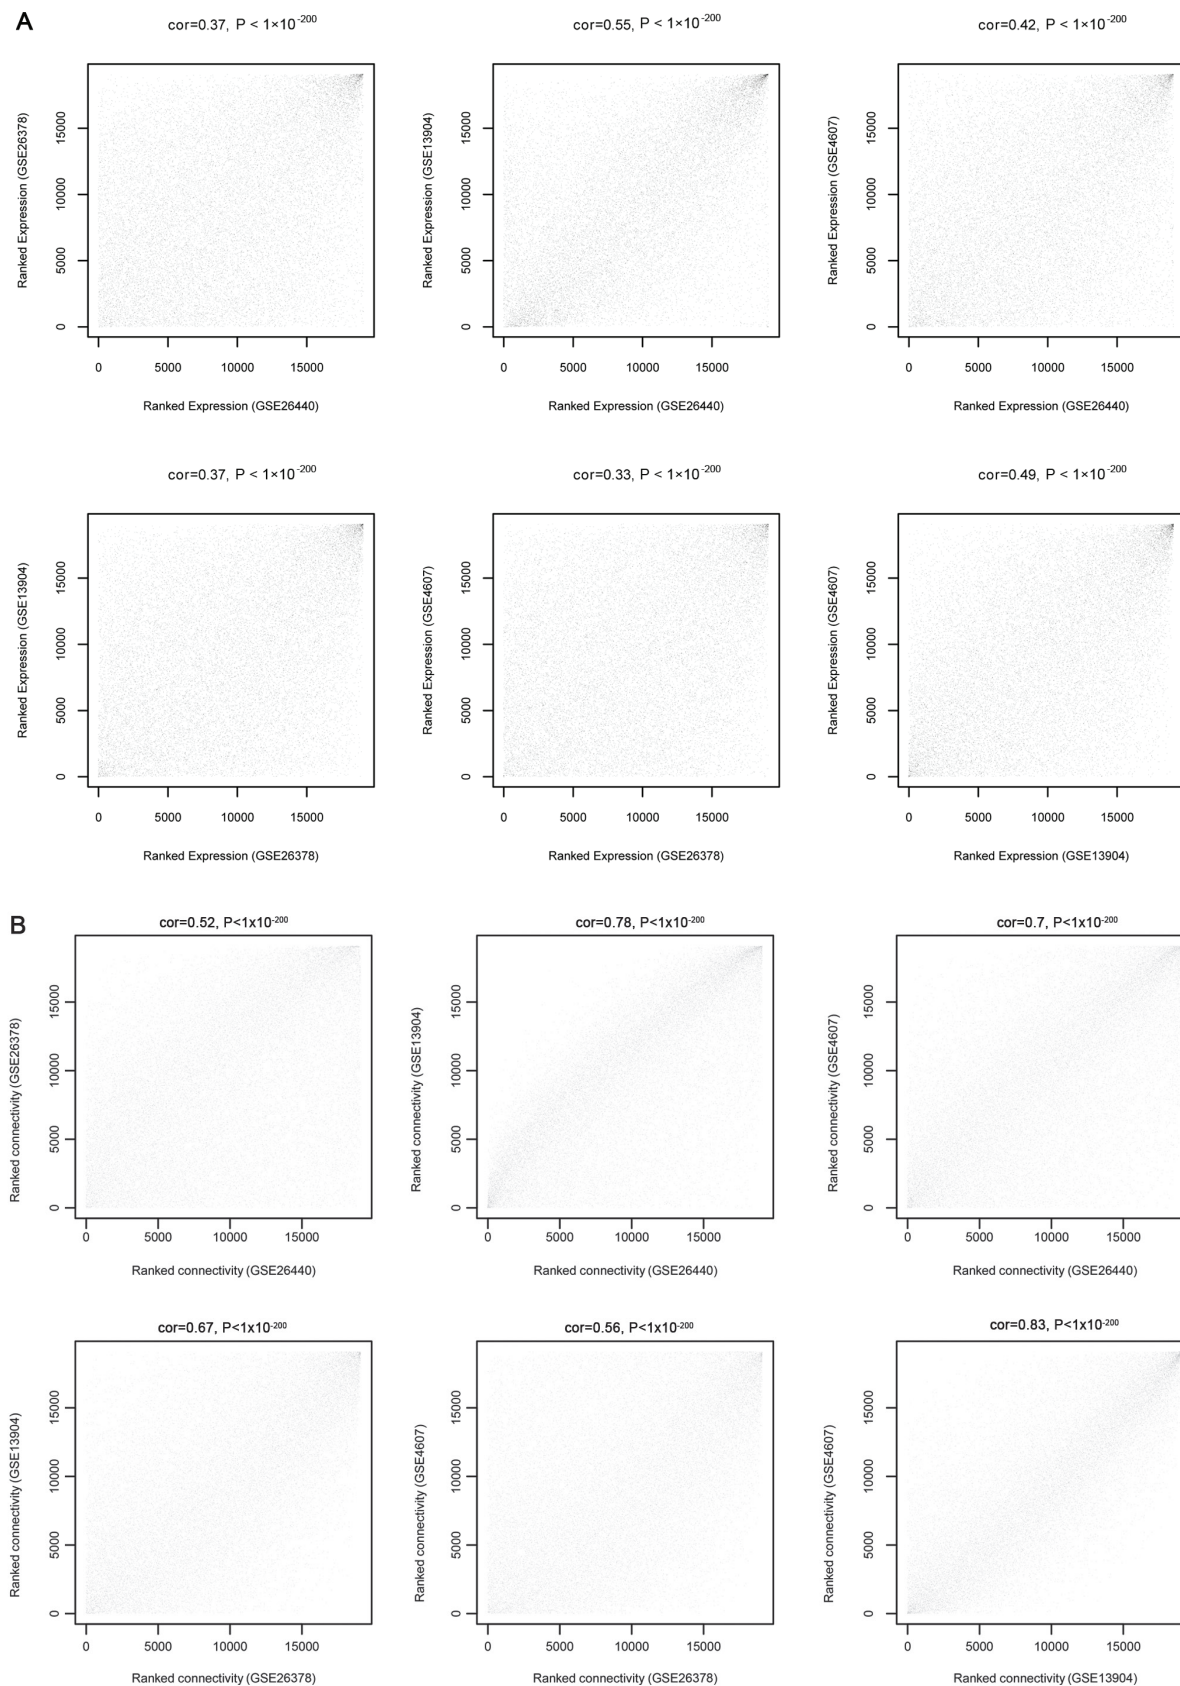

Supplement: Supplementary file 1 [file downloadSupplementary]
